# Supplementary material for: Explicit and Intrinsic Intention to Receive COVID-19 Vaccination among Heterosexuals and Sexual Minorities in Taiwan
Source: MDPI journal article supplement (doi:10.3390/ijerph18147260), 2021-07-07
Supplement: s1 [file s1]

**Supplementary Table S1.** Measures used in this study

| Measures                                                                                              | Items                                                                                  | Response scale                                                                                                                                                    |
|-------------------------------------------------------------------------------------------------------|----------------------------------------------------------------------------------------|-------------------------------------------------------------------------------------------------------------------------------------------------------------------|
| Explicit intention to get vaccinated against COVID-19                                                 | Please rate your current willingness to receive a COVID-19 vaccine:                    | 1 (very low) to 10 (very high)                                                                                                                                    |
| Intrinsic Intention to Get Vaccinated for COVID-19 (Drivers of COVID-19 Vaccination Acceptance Scale) | 1. Vaccination is a very effective way to protect me against COVID-19.                 | 1 = strongly disagree, 2 = disagree, 3 = slightly disagree, 4 = neither disagree nor agree, 5 = slightly agree, 6 = agree, 7 = strongly agree<br>*: reverse-coded |
|                                                                                                       | 2. I know very well how vaccination protects me from COVID-19.                         |                                                                                                                                                                   |
|                                                                                                       | 3. It is important that I get the COVID-19 jab.                                        |                                                                                                                                                                   |
|                                                                                                       | 4. Vaccination greatly reduces my risk of catching COVID-19.                           |                                                                                                                                                                   |
|                                                                                                       | 5. I understand how the flu jab helps my body fight the COVID-19 virus.                |                                                                                                                                                                   |
|                                                                                                       | 6. The COVID-19 jab plays an important role in protecting my life and that of others.  |                                                                                                                                                                   |
|                                                                                                       | 7.* I feel under pressure to get the COVID-19 jab.                                     |                                                                                                                                                                   |
|                                                                                                       | 8. The contribution of the COVID-19 jab to my health and well-being is very important. |                                                                                                                                                                   |
|                                                                                                       | 9. I can choose whether to get a COVID-19 jab or not.                                  |                                                                                                                                                                   |
|                                                                                                       | 10.* How the COVID-19 jab works to protect my health is a mystery to me.               |                                                                                                                                                                   |
|                                                                                                       | 11.* I get the COVID-19 jab only because I am required to do so.                       |                                                                                                                                                                   |
|                                                                                                       | 12. Getting the COVID-19 jab has a positive influence on my health.                    |                                                                                                                                                                   |
| Risk perception of COVID-19                                                                           | Item 1: If you were to develop flu-like symptoms tomorrow, would you worry?            | 1 = not at all worried, 2 = worried less than normal, 3 = about the same, 4 = worried more than normal, 5 = extremely worried                                     |
|                                                                                                       | Item 2: In the past one week, have you ever worried about catching COVID-              | 1 = no, never think about it, 2 = think about it but it didn't                                                                                                    |

|  |                                                                                                                              |                                                                                                 |
|--|------------------------------------------------------------------------------------------------------------------------------|-------------------------------------------------------------------------------------------------|
|  | 19?                                                                                                                          | worry me, 3 = worried me a bit, 4 = worried me a lot, 5 = worried about it all the time         |
|  | Item 3: Please rate the current level of your worry towards COVID-19:                                                        | Score ranged from 1-10 (1 = very mild, 10 = very severe)                                        |
|  | Item 4: How likely do you think it is that you will contract COVID-19 over the next 1 month?                                 | 1 = never, 2 = very unlikely, 3 = unlikely, 4 = evens, 5 = likely, 6 = very likely, 7 = certain |
|  | Item 5: What do you think are your chances of getting COVID-19 over the next 1 month compared to others outside your family? | 1= not at all, 2 = much less, 3 = less, 4 = evens, 5 = more, 6 = much more, 7 = certain         |
